# Supplementary material for: Mouse PVRIG Has CD8+ T Cell–Specific Coinhibitory Functions and Dampens Antitumor Immunity
Source: Oxford University Press journal article supplement (doi:10.1158/2326-6066.cir-18-0460), 2019-01-18
Supplement: 23266066cir180460-sup-204848_3_supp_5170697_pzd8d0.xlsx [file 23266066cir180460-sup-204848_3_supp_5170697_pzd8d0.xlsx]

## Sheet: 145 significant genes
	Log2 fold change	std error (log2)	Lower confidence limit (log2)	Upper confidence limit (log2)	Linear fold change	Lower confidence limit (linear)	Upper confidence limit (linear)	P-value	BY.p.value	probe.ID
Klrc2-mRNA	2.36	0.481	1.42	3.31	5.15	2.68	9.89	0.00061	0.236	NM_010653.4:259
Gzma-mRNA	2.24	0.51	1.25	3.24	4.74	2.37	9.47	0.00133	0.236	NM_010370.2:188
Ifitm1-mRNA	1.97	0.457	1.07	2.86	3.91	2.1	7.28	0.00156	0.236	NM_001112715.1:412
Il11ra1-mRNA	1.8	0.406	1	2.59	3.48	2	6.04	0.00128	0.236	NM_010549.3:22
Itga1-mRNA	1.76	0.389	0.998	2.52	3.39	2	5.75	0.0011	0.236	NM_001033228.3:2550
Tigit-mRNA	1.72	0.403	0.927	2.51	3.29	1.9	5.68	0.00166	0.236	NM_001146325.1:730
Il12rb2-mRNA	1.68	0.493	0.715	2.65	3.21	1.64	6.26	0.00664	0.325	NM_008354.3:1395
Havcr2-mRNA	1.67	0.483	0.719	2.61	3.17	1.65	6.11	0.00624	0.32	NM_134250.2:134
Pdcd1-mRNA	1.64	0.465	0.725	2.55	3.11	1.65	5.85	0.00555	0.308	NM_008798.1:1134
Rora-mRNA	1.61	0.372	0.879	2.34	3.05	1.84	5.05	0.0015	0.236	NM_013646.1:1045
Lag3-mRNA	1.58	0.372	0.854	2.31	3	1.81	4.97	0.00168	0.236	NM_008479.1:1700
Cd80-mRNA	1.53	0.434	0.677	2.38	2.88	1.6	5.2	0.00553	0.308	NM_009855.2:210
Gzmb-mRNA	1.53	0.521	0.508	2.55	2.89	1.42	5.86	0.0149	0.408	NM_013542.2:1020
Fasl-mRNA	1.52	0.502	0.539	2.51	2.88	1.45	5.69	0.0126	0.388	NM_010177.3:645
Dusp4-mRNA	1.49	0.412	0.678	2.3	2.8	1.6	4.91	0.00482	0.301	NM_176933.4:2200
Ccl11-mRNA	1.48	0.431	0.636	2.32	2.79	1.55	5.01	0.00637	0.321	NM_011330.3:430
Icos-mRNA	1.46	0.372	0.731	2.19	2.75	1.66	4.56	0.00285	0.279	NM_017480.1:142
Klra5-mRNA	1.45	0.363	0.739	2.16	2.73	1.67	4.47	0.00253	0.279	NM_008463.2:174
Ccl3-mRNA	1.45	0.435	0.595	2.3	2.73	1.51	4.93	0.00766	0.347	NM_011337.1:60
Alcam-mRNA	1.43	0.369	0.709	2.16	2.7	1.63	4.46	0.00306	0.279	NM_009655.1:2605
Klrk1-mRNA	1.42	0.377	0.684	2.16	2.68	1.61	4.48	0.00365	0.299	NM_001083322.1:144
Il1r2-mRNA	1.42	0.411	0.611	2.22	2.67	1.53	4.67	0.00626	0.32	NM_010555.4:458
Ccr8-mRNA	1.41	0.255	0.906	1.91	2.65	1.87	3.75	0.000259	0.236	NM_007720.2:426
Il2ra-mRNA	1.41	0.391	0.647	2.18	2.66	1.57	4.53	0.00471	0.301	NM_008367.2:325
Tnfrsf9-mRNA	1.41	0.488	0.455	2.37	2.66	1.37	5.17	0.016	0.424	NM_001077508.1:1590
Tnfsf11-mRNA	1.38	0.4	0.601	2.17	2.61	1.52	4.49	0.00608	0.32	NM_011613.3:615
Litaf-mRNA	1.33	0.322	0.697	1.96	2.51	1.62	3.89	0.00207	0.249	NM_019980.1:1100
Klrc1-mRNA	1.31	0.398	0.527	2.09	2.47	1.44	4.24	0.00822	0.347	NM_001136068.1:68
Itgb4-mRNA	1.28	0.434	0.432	2.14	2.43	1.35	4.39	0.0144	0.408	NM_001005608.2:3355
Tbx21-mRNA	1.24	0.373	0.505	1.97	2.36	1.42	3.91	0.00781	0.347	NM_019507.1:625
Ccl5-mRNA	1.21	0.342	0.54	1.88	2.31	1.45	3.68	0.00538	0.308	NM_013653.3:240
Ctla4-mRNA	1.21	0.372	0.483	1.94	2.32	1.4	3.84	0.00861	0.347	NM_009843.3:1475
Fas-mRNA	1.18	0.259	0.672	1.69	2.27	1.59	3.22	0.00105	0.236	NM_007987.2:596
Stat3-mRNA	1.17	0.282	0.619	1.72	2.25	1.54	3.3	0.00195	0.249	NM_213659.2:2130
Ccl4-mRNA	1.17	0.391	0.402	1.94	2.25	1.32	3.83	0.0136	0.401	NM_013652.1:140
Il10ra-mRNA	1.17	0.414	0.361	1.99	2.25	1.28	3.96	0.0178	0.456	NM_008348.2:75
Il2rb-mRNA	1.16	0.32	0.532	1.79	2.23	1.45	3.45	0.00467	0.301	NM_008368.3:2365
Cd70-mRNA	1.16	0.365	0.449	1.88	2.24	1.37	3.68	0.00963	0.354	NM_011617.1:650
Irf8-mRNA	1.16	0.364	0.446	1.87	2.23	1.36	3.66	0.00971	0.354	NM_008320.3:2274
Casp3-mRNA	1.14	0.356	0.442	1.84	2.2	1.36	3.57	0.00946	0.354	NM_009810.2:630
Hif1a-mRNA	1.11	0.249	0.626	1.6	2.16	1.54	3.04	0.00119	0.236	NM_010431.2:1294
Cd28-mRNA	1.07	0.258	0.559	1.57	2.09	1.47	2.97	0.00206	0.249	NM_007642.4:3304
Rel-mRNA	1.05	0.258	0.539	1.55	2.06	1.45	2.93	0.00234	0.272	NM_009044.2:1290
Il18r1-mRNA	1.04	0.28	0.49	1.59	2.06	1.4	3.01	0.00405	0.301	NM_001161842.1:620
Cd244-mRNA	1.03	0.345	0.354	1.71	2.04	1.28	3.27	0.0137	0.401	NM_018729.2:262
Tgfb1-mRNA	1.02	0.194	0.639	1.4	2.03	1.56	2.64	0.000368	0.236	NM_011577.1:1470
Slamf1-mRNA	0.977	0.314	0.361	1.59	1.97	1.28	3.02	0.0111	0.381	NM_013730.4:1770
Klrd1-mRNA	0.973	0.199	0.583	1.36	1.96	1.5	2.57	0.000639	0.236	NM_010654.2:434
Nrp1-mRNA	0.972	0.287	0.411	1.53	1.96	1.33	2.9	0.00687	0.331	NM_008737.2:1190
Tnfrsf18-mRNA	0.959	0.33	0.311	1.61	1.94	1.24	3.05	0.0158	0.423	NM_009400.2:840
Cdkn1a-mRNA	0.945	0.299	0.359	1.53	1.93	1.28	2.89	0.0102	0.362	NM_007669.4:1670
Tnfrsf1b-mRNA	0.891	0.279	0.345	1.44	1.85	1.27	2.71	0.00951	0.354	NM_011610.3:3270
Amica1-mRNA	0.885	0.287	0.323	1.45	1.85	1.25	2.73	0.0116	0.383	NM_001005421.4:1002
Itgal-mRNA	0.884	0.227	0.44	1.33	1.85	1.36	2.51	0.00296	0.279	NM_008400.2:950
Socs1-mRNA	0.865	0.207	0.46	1.27	1.82	1.38	2.41	0.00187	0.249	NM_009896.2:1020
Cxcr6-mRNA	0.845	0.298	0.261	1.43	1.8	1.2	2.69	0.0177	0.456	NM_030712.4:650
Icam1-mRNA	0.841	0.238	0.375	1.31	1.79	1.3	2.47	0.0054	0.308	NM_010493.2:2195
Irak2-mRNA	0.831	0.229	0.382	1.28	1.78	1.3	2.43	0.00461	0.301	NM_001113553.1:485
Slamf7-mRNA	0.823	0.296	0.242	1.4	1.77	1.18	2.64	0.0195	0.479	NM_144539.5:750
Nt5e-mRNA	0.808	0.188	0.44	1.18	1.75	1.36	2.26	0.00155	0.236	NM_011851.3:1600
Il3ra-mRNA	0.792	0.286	0.232	1.35	1.73	1.17	2.55	0.0197	0.479	NM_008369.1:567
Cdh1-mRNA	0.782	0.258	0.277	1.29	1.72	1.21	2.44	0.0125	0.388	NM_009864.2:1610
Cd86-mRNA	0.748	0.213	0.331	1.17	1.68	1.26	2.24	0.00555	0.308	NM_019388.3:251
Abcb1a-mRNA	0.717	0.183	0.359	1.08	1.64	1.28	2.11	0.00287	0.279	NM_011076.1:2600
Nfatc1-mRNA	0.687	0.158	0.377	0.996	1.61	1.3	1.99	0.00146	0.236	NM_016791.4:1570
Ifngr1-mRNA	0.684	0.156	0.378	0.991	1.61	1.3	1.99	0.00139	0.236	NM_010511.2:985
Igf2r-mRNA	0.664	0.202	0.269	1.06	1.58	1.21	2.08	0.00808	0.347	NM_010515.1:2585
Jak3-mRNA	0.652	0.215	0.23	1.07	1.57	1.17	2.1	0.0127	0.388	NM_010589.5:145
Thy1-mRNA	0.629	0.167	0.301	0.957	1.55	1.23	1.94	0.0037	0.299	NM_009382.3:425
Tnfaip3-mRNA	0.619	0.142	0.34	0.897	1.54	1.27	1.86	0.00144	0.236	NM_009397.2:232
Cd48-mRNA	0.593	0.185	0.23	0.955	1.51	1.17	1.94	0.0094	0.354	NM_007649.4:370
Zap70-mRNA	0.58	0.213	0.163	0.997	1.49	1.12	2	0.0213	0.498	NM_009539.2:1030
Myd88-mRNA	0.579	0.198	0.192	0.966	1.49	1.14	1.95	0.015	0.408	NM_010851.2:1595
Il21r-mRNA	0.576	0.185	0.213	0.938	1.49	1.16	1.92	0.011	0.381	NM_021887.1:619
Pik3cg-mRNA	0.556	0.184	0.195	0.917	1.47	1.14	1.89	0.013	0.392	NM_020272.2:2890
Itgb2-mRNA	0.555	0.123	0.313	0.796	1.47	1.24	1.74	0.00114	0.236	NM_008404.4:2542
Spn-mRNA	0.552	0.144	0.27	0.834	1.47	1.21	1.78	0.00329	0.291	NM_001037810.1:726
Stat4-mRNA	0.516	0.159	0.205	0.828	1.43	1.15	1.77	0.00869	0.347	NM_011487.4:1816
Lcp1-mRNA	0.493	0.15	0.198	0.788	1.41	1.15	1.73	0.00831	0.347	NM_001247984.1:3344
Fyn-mRNA	0.486	0.155	0.181	0.79	1.4	1.13	1.73	0.0107	0.377	NM_008054.2:1030
Nfkb1-mRNA	0.443	0.155	0.14	0.746	1.36	1.1	1.68	0.0169	0.439	NM_008689.2:2125
Ythdf2-mRNA	0.426	0.109	0.212	0.64	1.34	1.16	1.56	0.00297	0.279	NM_145393.4:750
H2-T23-mRNA	0.416	0.0972	0.226	0.607	1.33	1.17	1.52	0.00161	0.236	NM_010398.3:441
Cd47-mRNA	0.347	0.124	0.105	0.589	1.27	1.08	1.5	0.0186	0.473	NM_010581.3:165
Il2rg-mRNA	0.319	0.105	0.113	0.524	1.25	1.08	1.44	0.0124	0.388	NM_013563.3:1226
H2-D1-mRNA	0.316	0.0852	0.149	0.483	1.24	1.11	1.4	0.00409	0.301	NM_010380.3:1133
Ep300-mRNA	0.302	0.0919	0.122	0.483	1.23	1.09	1.4	0.00814	0.347	NM_177821.6:4305
Jak2-mRNA	0.282	0.0861	0.114	0.451	1.22	1.08	1.37	0.0083	0.347	NM_008413.2:1049
Traf6-mRNA	0.249	0.0674	0.117	0.381	1.19	1.08	1.3	0.00419	0.301	NM_009424.2:980
Ewsr1-mRNA	-0.215	0.0617	-0.336	-0.0942	0.862	0.792	0.937	0.00585	0.318	NM_007968.3:150
Anp32b-mRNA	-0.313	0.0991	-0.507	-0.119	0.805	0.704	0.921	0.0102	0.362	NM_130889.2:480
C1qbp-mRNA	-0.338	0.114	-0.561	-0.115	0.791	0.678	0.923	0.014	0.406	NM_007573.2:630
Ilf3-mRNA	-0.348	0.103	-0.551	-0.145	0.786	0.683	0.904	0.00716	0.34	NM_010561.2:1902
Irf3-mRNA	-0.401	0.102	-0.6	-0.202	0.758	0.66	0.87	0.00274	0.279	NM_016849.4:526
Mapk8-mRNA	-0.482	0.168	-0.812	-0.153	0.716	0.57	0.9	0.0167	0.438	NM_016700.3:970
Bst2-mRNA	-0.487	0.159	-0.799	-0.176	0.713	0.575	0.885	0.012	0.388	NM_198095.2:468
Ddx58-mRNA	-0.509	0.185	-0.871	-0.146	0.703	0.547	0.904	0.0205	0.487	NM_172689.3:1751
Psmd7-mRNA	-0.529	0.162	-0.847	-0.211	0.693	0.556	0.864	0.00852	0.347	NM_010817.2:1424
Smad3-mRNA	-0.54	0.195	-0.922	-0.157	0.688	0.528	0.897	0.0199	0.481	NM_016769.3:1845
Irf7-mRNA	-0.541	0.161	-0.857	-0.225	0.688	0.552	0.856	0.00733	0.342	NM_016850.2:705
Lamp1-mRNA	-0.568	0.194	-0.947	-0.188	0.675	0.519	0.878	0.015	0.408	NM_010684.2:2080
Runx1-mRNA	-0.594	0.159	-0.905	-0.283	0.662	0.534	0.822	0.00382	0.299	NM_001111021.1:3055
Smad4-mRNA	-0.599	0.17	-0.933	-0.265	0.66	0.524	0.832	0.00557	0.308	NM_008540.2:2885
Nup107-mRNA	-0.641	0.176	-0.987	-0.295	0.641	0.505	0.815	0.00461	0.301	NM_134010.2:200
Atg7-mRNA	-0.7	0.155	-1	-0.396	0.616	0.499	0.76	0.00111	0.236	NM_028835.1:855
Mavs-mRNA	-0.807	0.274	-1.35	-0.269	0.571	0.394	0.83	0.0147	0.408	NM_144888.1:2510
Tnfrsf14-mRNA	-0.889	0.3	-1.48	-0.301	0.54	0.359	0.812	0.0142	0.407	NM_178931.2:625
Cd1d1-mRNA	-0.894	0.29	-1.46	-0.326	0.538	0.363	0.798	0.0115	0.383	NM_007639.3:1340
Mif-mRNA	-0.978	0.307	-1.58	-0.376	0.508	0.334	0.771	0.00977	0.354	NM_010798.2:373
Pecam1-mRNA	-0.998	0.345	-1.67	-0.321	0.501	0.313	0.8	0.0161	0.424	NM_008816.2:1100
Ifit3-mRNA	-1.02	0.283	-1.58	-0.465	0.493	0.336	0.724	0.00482	0.301	NM_010501.1:1290
Myc-mRNA	-1.04	0.272	-1.57	-0.506	0.487	0.336	0.704	0.00337	0.291	NM_010849.4:630
Jun-mRNA	-1.04	0.277	-1.58	-0.497	0.486	0.334	0.709	0.00376	0.299	NM_010591.2:2212
Ikbke-mRNA	-1.05	0.286	-1.61	-0.488	0.483	0.328	0.713	0.00434	0.301	NM_019777.3:618
Xaf1-mRNA	-1.08	0.217	-1.51	-0.657	0.472	0.351	0.634	0.000547	0.236	NM_001037713.3:100
Birc5-mRNA	-1.08	0.391	-1.85	-0.317	0.472	0.278	0.803	0.0197	0.479	NM_009689.2:237
Ecsit-mRNA	-1.11	0.367	-1.83	-0.387	0.464	0.282	0.765	0.013	0.392	NM_001253897.1:348
Abca1-mRNA	-1.25	0.387	-2.01	-0.497	0.419	0.248	0.709	0.00879	0.347	NM_013454.3:6865
Ddx60-mRNA	-1.28	0.259	-1.78	-0.768	0.413	0.29	0.587	0.000598	0.236	NM_001081215.1:2965
Cmah-mRNA	-1.31	0.424	-2.14	-0.475	0.405	0.228	0.719	0.0116	0.383	NM_001111110.2:664
Cd55-mRNA	-1.39	0.398	-2.17	-0.605	0.383	0.223	0.658	0.00594	0.318	NM_010016.2:1058
Oasl1-mRNA	-1.41	0.464	-2.32	-0.5	0.376	0.2	0.707	0.0125	0.388	NM_145209.3:626
Sell-mRNA	-1.44	0.518	-2.45	-0.423	0.369	0.183	0.746	0.0196	0.479	NM_001164059.1:664
Tlr1-mRNA	-1.48	0.543	-2.54	-0.415	0.359	0.171	0.75	0.0214	0.498	NM_030682.1:805
Btla-mRNA	-1.52	0.391	-2.28	-0.751	0.349	0.205	0.594	0.00306	0.279	NM_001037719.2:24
Gzmm-mRNA	-1.53	0.448	-2.41	-0.655	0.345	0.188	0.635	0.00652	0.324	NM_008504.2:610
Ccr9-mRNA	-1.55	0.487	-2.5	-0.596	0.342	0.176	0.661	0.00972	0.354	NM_009913.6:820
Mx2-mRNA	-1.68	0.517	-2.69	-0.663	0.313	0.155	0.632	0.00881	0.347	NM_013606.1:2095
Eng-mRNA	-1.68	0.549	-2.75	-0.601	0.312	0.148	0.659	0.0121	0.388	NM_001146350.1:574
Ifi44-mRNA	-1.77	0.529	-2.81	-0.733	0.293	0.143	0.602	0.00741	0.342	NM_133871.2:990
Anxa1-mRNA	-1.77	0.641	-3.03	-0.513	0.293	0.123	0.701	0.0201	0.482	NM_010730.2:400
Lif-mRNA	-1.8	0.659	-3.09	-0.507	0.288	0.118	0.704	0.0212	0.498	NM_008501.2:3435
Tnfsf8-mRNA	-1.83	0.428	-2.67	-0.992	0.281	0.157	0.503	0.00162	0.236	NM_009403.2:125
Tlr7-mRNA	-1.9	0.412	-2.71	-1.09	0.268	0.153	0.469	0.000955	0.236	NM_133211.3:3210
PVRIG-mRNA	-1.92	0.524	-2.95	-0.895	0.264	0.13	0.538	0.00432	0.301	XM_011240963.2:380
Mapk11-mRNA	-1.97	0.636	-3.22	-0.723	0.255	0.108	0.606	0.0113	0.383	NM_011161.5:396
ACVR1-mRNA	-2.03	0.568	-3.14	-0.919	0.245	0.113	0.529	0.00502	0.308	NM_007394.3:2255
Igf1r-mRNA	-2.04	0.631	-3.28	-0.808	0.242	0.103	0.571	0.00885	0.347	NM_010513.2:3390
F13a1-mRNA	-2.12	0.706	-3.5	-0.732	0.231	0.0885	0.602	0.0134	0.4	NM_001166391.1:2790
Il34-mRNA	-2.33	0.791	-3.88	-0.782	0.199	0.0678	0.582	0.0146	0.408	NM_001135100.1:848
Pdgfc-mRNA	-2.37	0.773	-3.89	-0.853	0.194	0.0677	0.553	0.012	0.388	NM_019971.2:1165
Col3a1-mRNA	-2.37	0.798	-3.93	-0.8	0.194	0.0656	0.574	0.0142	0.407	NM_009930.1:4370
Ltbr-mRNA	-2.37	0.854	-4.04	-0.696	0.194	0.0607	0.617	0.0196	0.479	NM_010736.3:1962
Col4a1-mRNA	-2.44	0.832	-4.07	-0.804	0.185	0.0597	0.573	0.0151	0.408	NM_009931.2:4116
Cd34-mRNA	-2.47	0.89	-4.21	-0.725	0.181	0.0539	0.605	0.0196	0.479	NM_001111059.1:560
